# Supplementary material for: Synthesis and structural, magnetic and spectroscopic characterization of iron(iii) complexes with in situ formed ligands from methyl-2-pyridyl ketone transformations
Source: Royal Society of Chemistry journal article supplement (doi:10.1039/d2dt03944c), 2023-01-01
Supplement: d2dt03944c1.pdf [file d2dt03944c1.pdf]

## Supporting Information

### Synthesis, structural, magnetic and spectroscopic characterization of iron(III) complexes with in situ formed ligands from methyl-2-pyridyl ketone transformations

Sofia Tzani,<sup>a</sup> Michael Pissas,<sup>a</sup> Vassilis Psycharis,<sup>a</sup> Dimitrios A. Pantazis,<sup>b</sup> Yiannis Sanakis,<sup>\*a</sup> and Catherine P. Raptopoulou<sup>\*a</sup>

<sup>a</sup>*Institute of Nanoscience and Nanotechnology, NCSR "Demokritos", 15310 Aghia Paraskevi, Athens, Greece*

<sup>b</sup>*Max-Planck-Institut für Kohlenforschung, Kaiser-Wilhelm-Platz 1, 45470 Mülheim an der Ruhr, Germany*

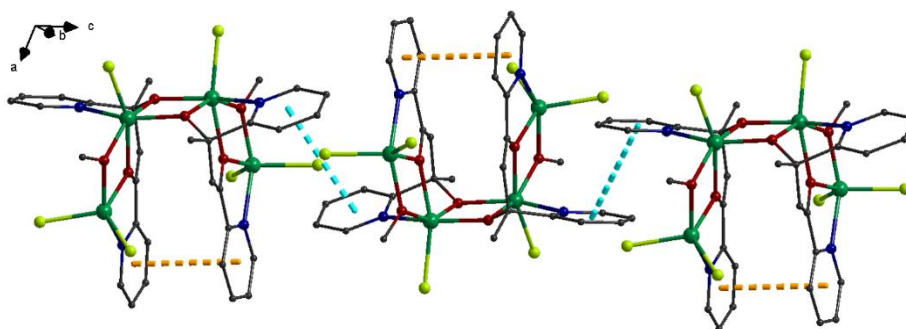

**Figure S1.** A small part of the 1D lattice structure of **1** due to intermolecular  $\pi$ - $\pi$  interactions (cyan dashed lines). Intra-molecular  $\pi$ - $\pi$  interactions are shown as orange dashed lines. Color code: Fe, green; Cl, lime; O, red; N, blue; C, dark grey. Hydrogen atoms are omitted for clarity.

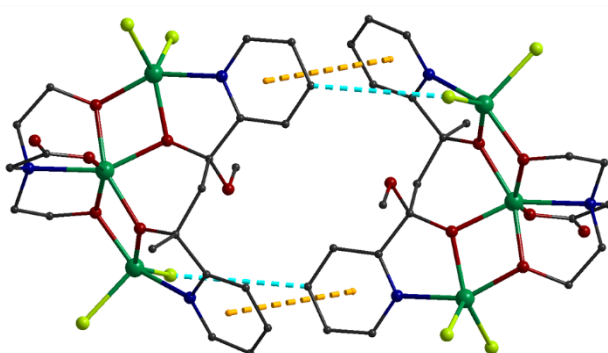

**Figure S2.** The dimers of **2** due to intermolecular  $\pi$ - $\pi$  interactions (orange dashed lines) and C-H...Cl interactions (cyan dashed lines). Color code: Fe, green; Cl, lime; O, red; N, blue; C, dark grey. Hydrogen atoms are omitted for clarity.

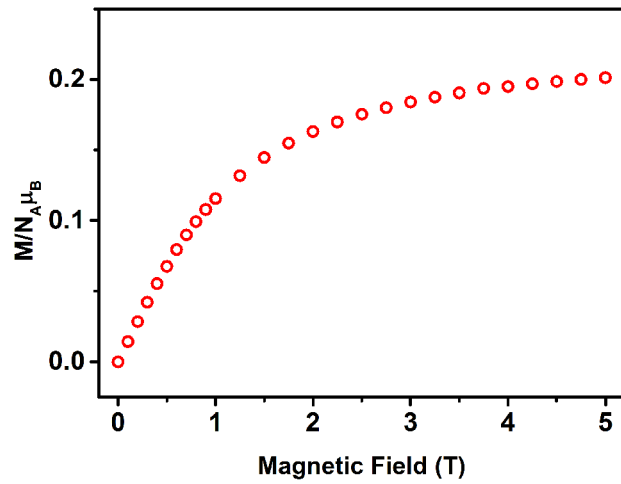

**Figure S3.** Plot of the field dependence of the magnetization of **1** at 2 K.
